# Supplementary material
Source: Springer Nature journal article supplement (https://www.springermedizin.de/resource/supplementary/12883_2010_338_MOESM8_ESM.pdf/9455178)

# GMFCS III

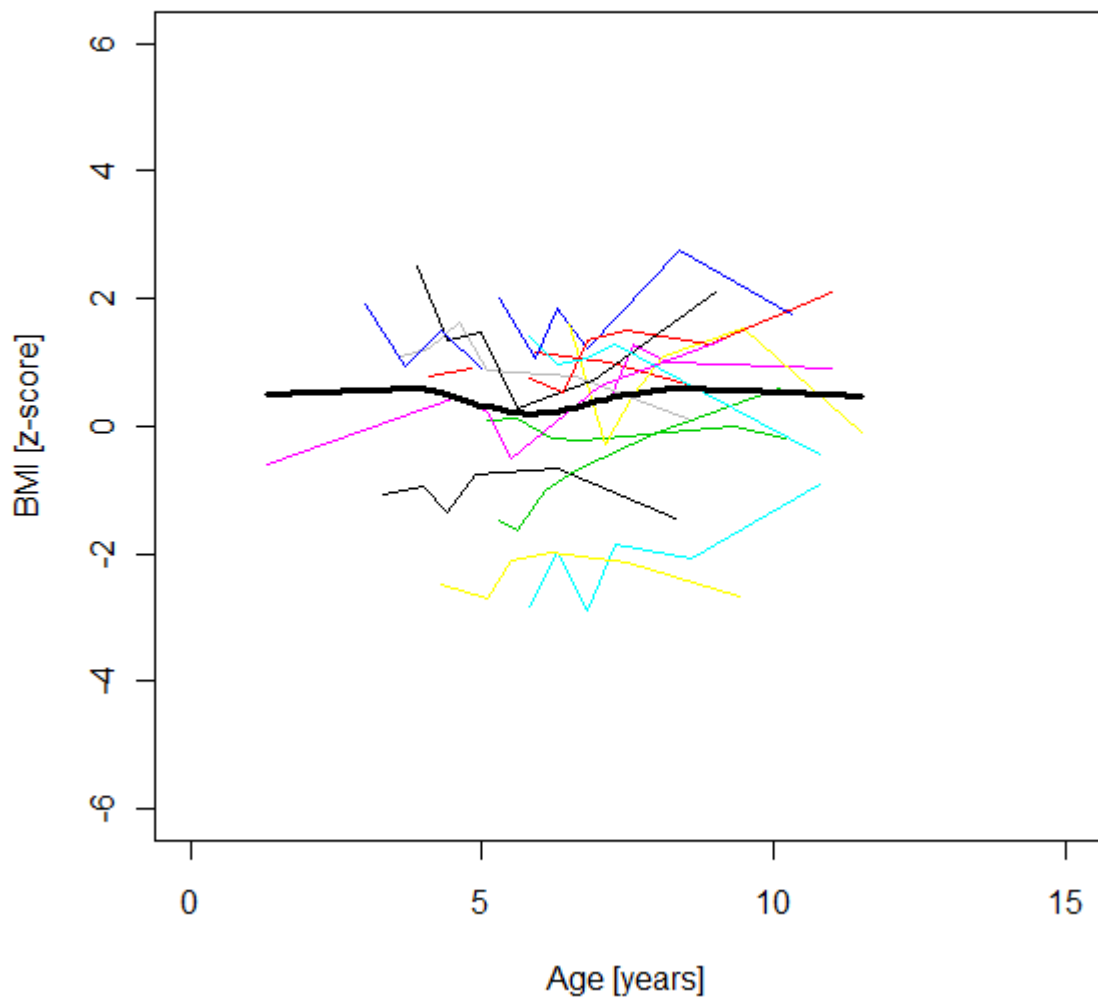

Supplement: MOESM8 [file 9455178]
